# Supplementary material
Source: PubMed Central journal article supplement (PMC2846959)

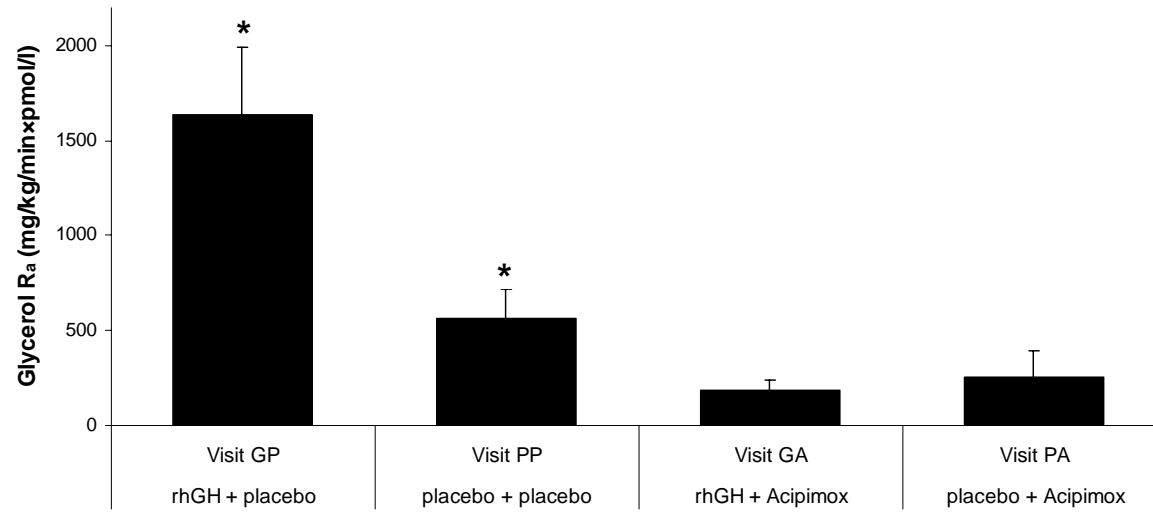

Supplement: jc.2009-0378_1.pdf [file jc.2009-0378_1.pdf]

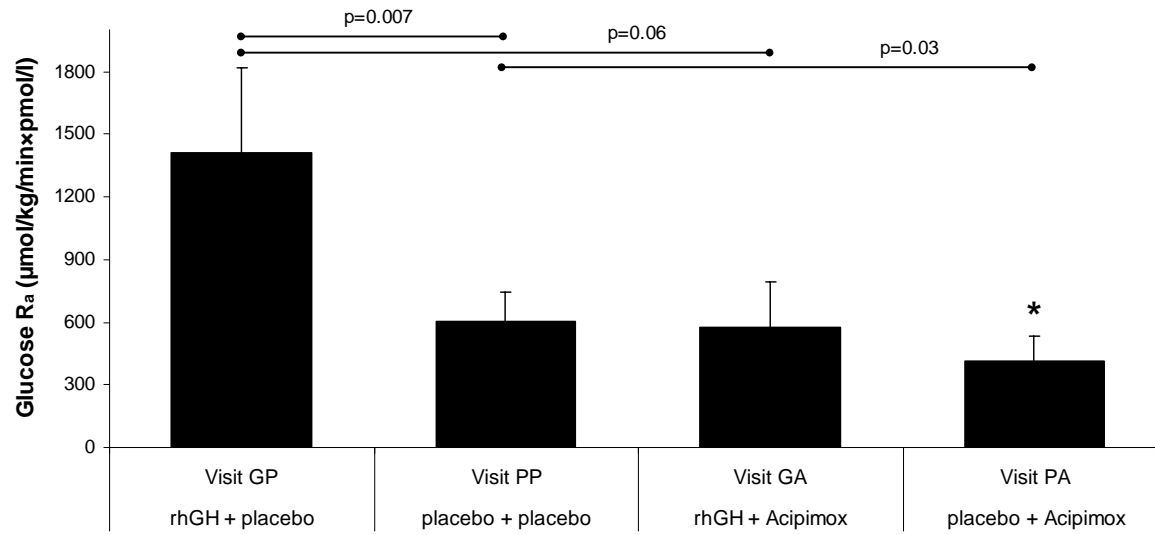

Supplement: jc.2009-0378_2.pdf [file jc.2009-0378_2.pdf]

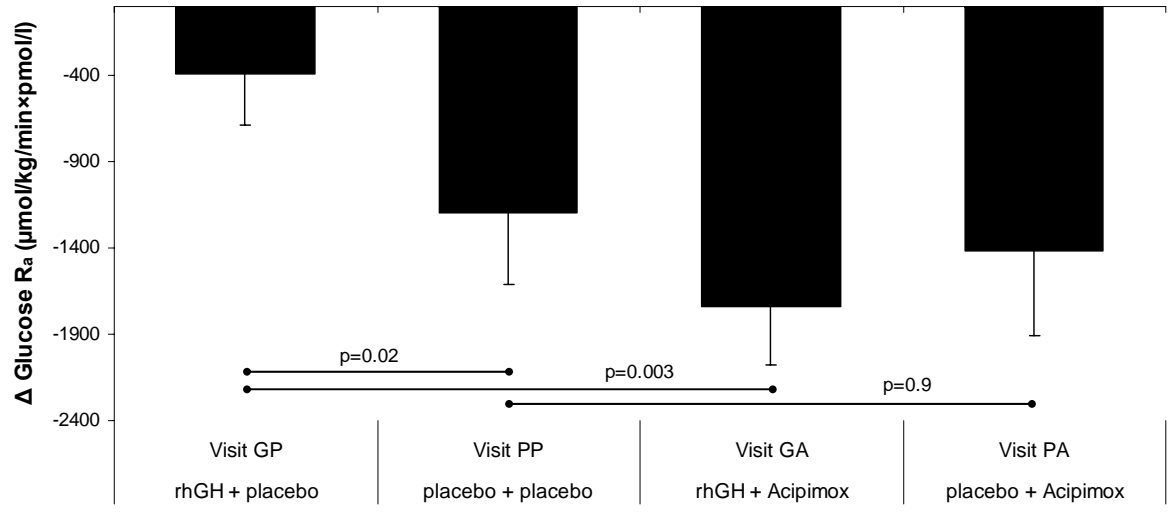

Supplement: jc.2009-0378_3.pdf [file jc.2009-0378_3.pdf]

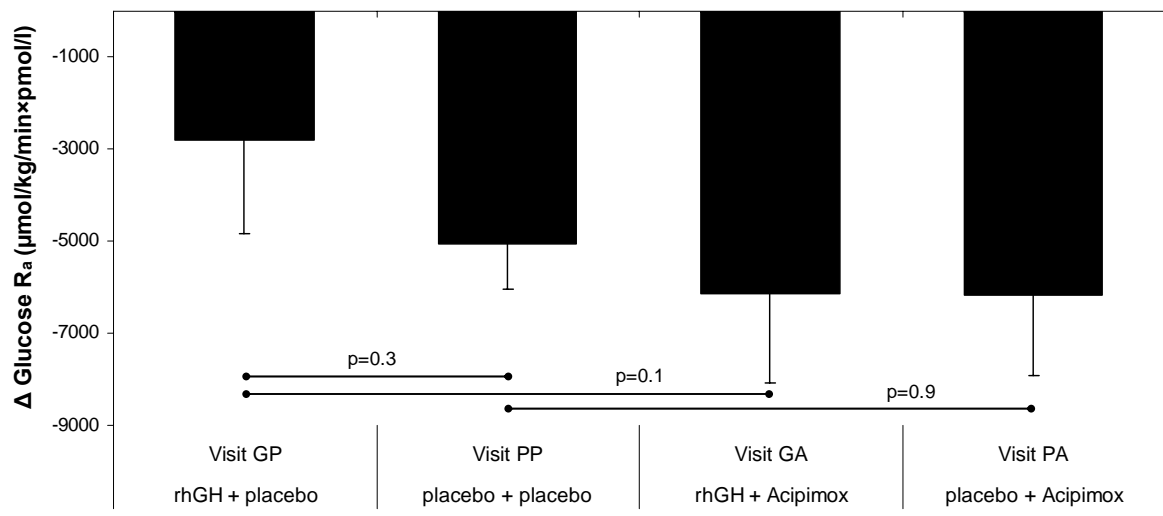

Supplement: jc.2009-0378_4.pdf [file jc.2009-0378_4.pdf]

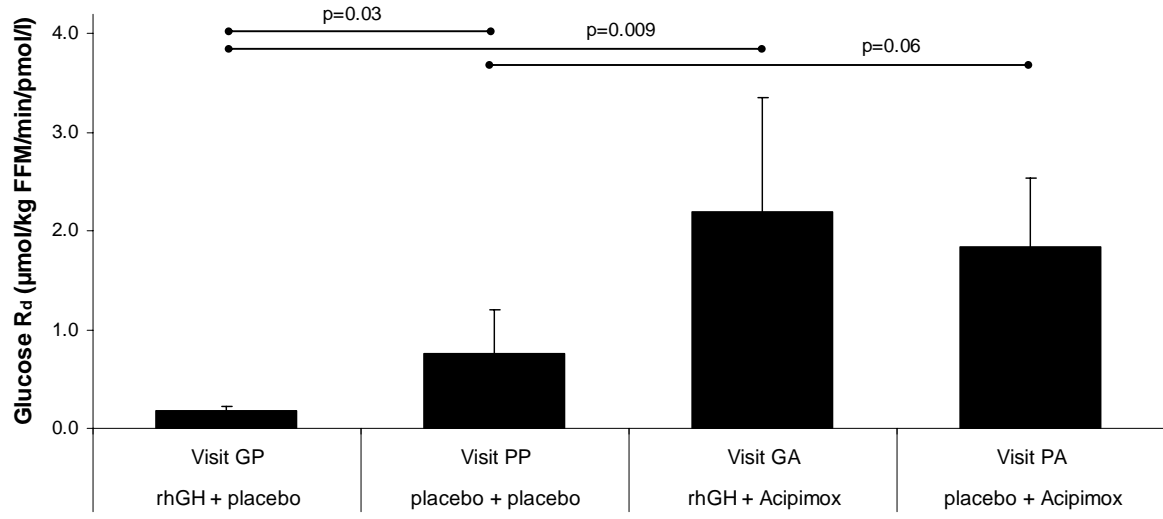

Supplement: jc.2009-0378_5.pdf [file jc.2009-0378_5.pdf]

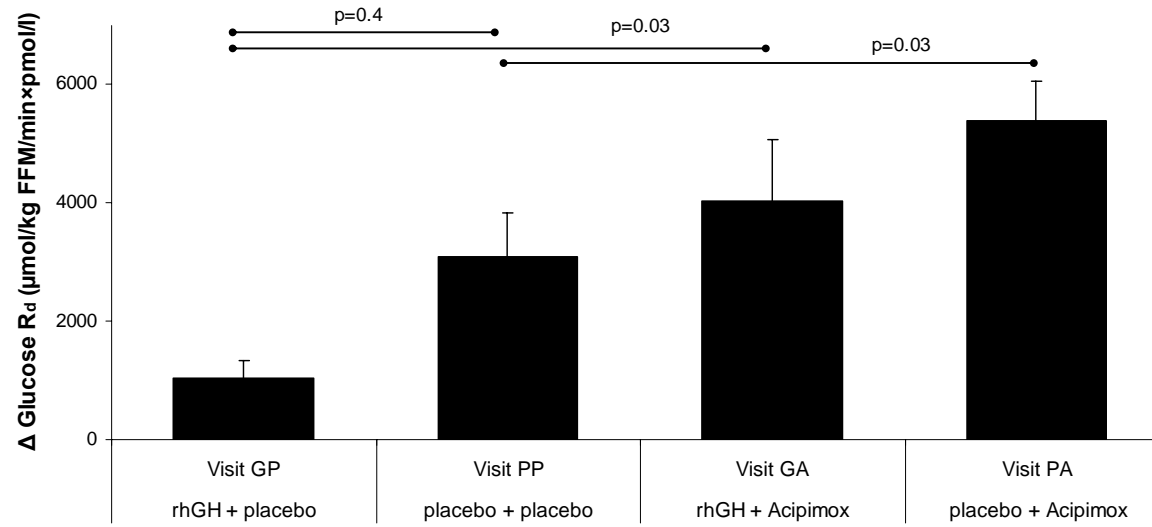

Supplement: jc.2009-0378_6.pdf [file jc.2009-0378_6.pdf]

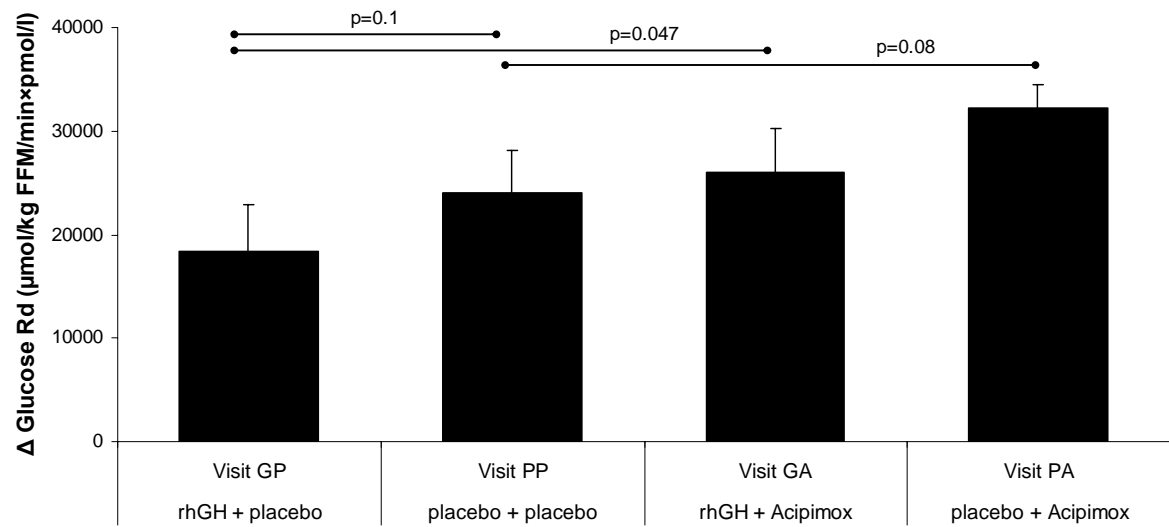

Supplement: jc.2009-0378_7.pdf [file jc.2009-0378_7.pdf]
